# Supplementary material for: Kidney Function and Arterial Calcification in Major Vascular Beds
Source: PubMed Central journal article supplement — J Am Heart Assoc. 2019 Apr 26;8(9):e010930. doi: 10.1161/JAHA.118.010930 (PMC6512096; doi:10.1161/jaha.118.010930), 2019-04-26
Supplement: JAH3-8-e010930-s001.pdf [file JAH3-8-e010930-s001.pdf]

# **SUPPLEMENTAL MATERIAL**

**Table S1. The association between GFRcr/GFRcr squared and calcification in different arteries.**

|                          | Difference (95% confidence interval)* |                      |                      |                      |
|--------------------------|---------------------------------------|----------------------|----------------------|----------------------|
|                          | CAC                                   | AAC                  | ECAC                 | ICAC                 |
| <b>Model I (n=2241)</b>  |                                       |                      |                      |                      |
| GFRcr                    | 0.34 (0.03, 0.65)                     | 0.47 (0.15, 0.78)    | 0.78 (0.46, 1.11)    | 0.44 (0.12, 0.76)    |
| GFRcr <sup>2</sup>       | -0.37 (-0.69, -0.06)                  | -0.51 (-0.83, -0.20) | -0.80 (-1.12, -0.48) | -0.47 (-0.79, -0.14) |
| <b>Model II (n=2220)</b> |                                       |                      |                      |                      |
| GFRcr                    | 0.63 (-0.12, 1.38)                    | 0.82 (0.12, 1.53)    | 1.55 (0.84, 2.25)    | 0.74 (0.09, 1.39)    |
| GFRcr <sup>2</sup>       | -0.70 (-1.45, 0.05)                   | -0.91 (-1.62, -0.21) | -1.56 (-2.27, -0.86) | -0.79 (-1.44, -0.14) |

Model 1: Adjusted for age, sex and cohort effect.

Model 2: Adjusted for model 1+ body mass index, hypertension, smoking, diabetes mellitus, total cholesterol, and HDL cholesterol.

\*Reported beta and confidence intervals are standardized log increase in calcification per one SD lower GFR estimates.

GFRcr<sup>2</sup> refers to addition of a squared GFR variable in the model.

SD: standard deviation; CAC: Coronary artery calcification; AAC: Aortic arch calcification; ECAC: Extracranial carotid artery calcification;

ICAC: Intracranial carotid artery calcification

**Figure S1. Non-linear association of kidney measures and arterial calcification in different vascular beds.**

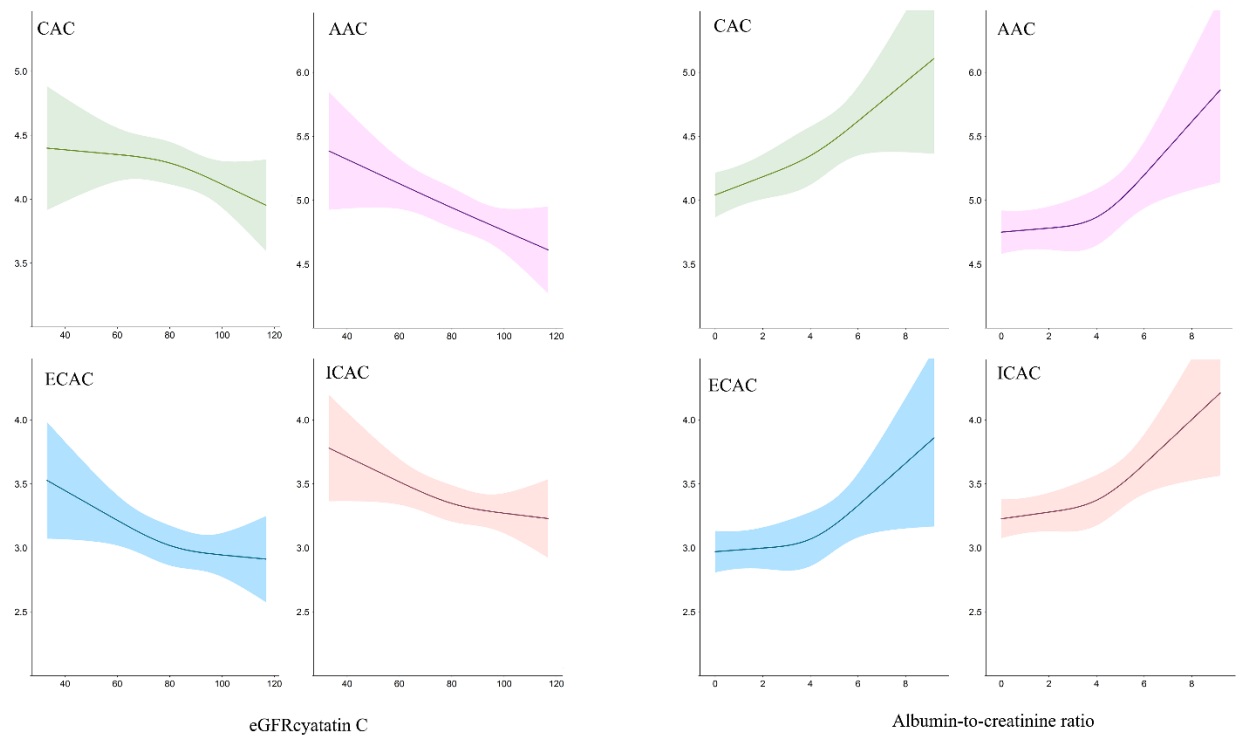

X-axes represent values of eGFR or logarithm of albumin-to-creatinine ratio and Y-axes represent logarithm of arterial calcification values. CAC: Coronary artery calcification; AAC: Aortic arch calcification; ECAC: Extracranial carotid artery calcification; ICAC: Intracranial carotid artery calcification.

**Figure S2. Non-linear association of eGFRcr and arterial calcification in different vascular beds.**

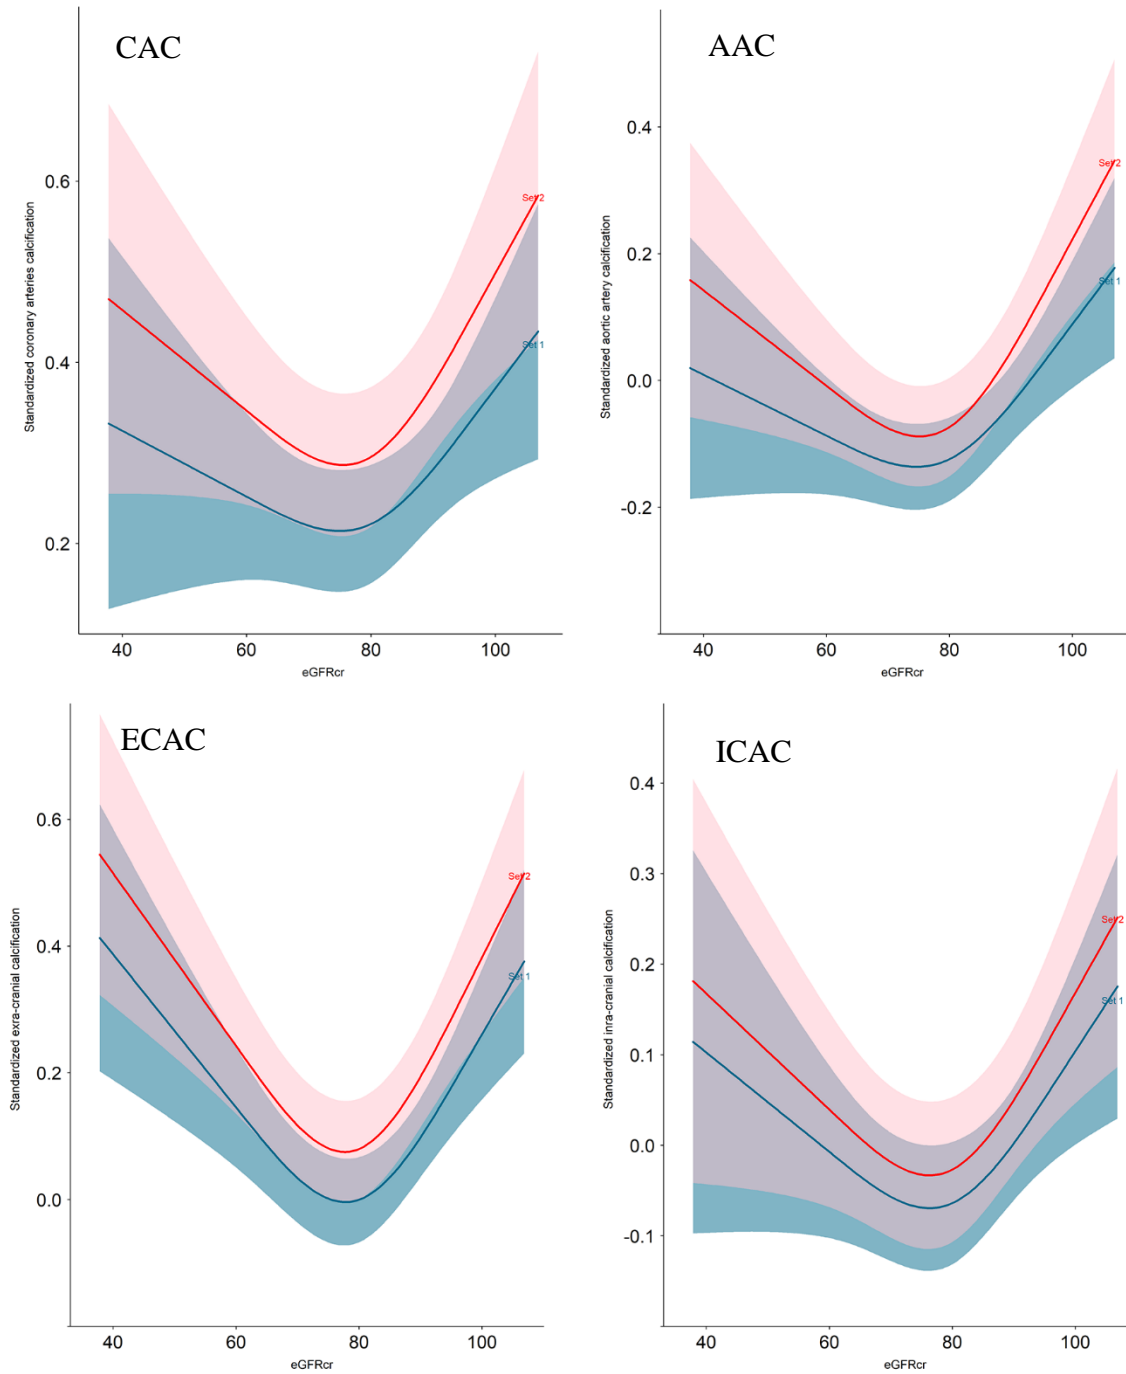

X-axes represent values of eGFRcr and Y-axes represent logarithm of arterial calcification values. Blue represent model including eGFRcr as a nonlinear term.

Red represent model including eGFRcr as a nonlinear term as well as age (as spline) and interactions of age (as a spline) and sex.
